# Supplementary material for: A tomato MADS-box protein, SlCMB1, regulates ethylene biosynthesis and carotenoid accumulation during fruit ripening
Source: PubMed Central journal article supplement (PMC5821886; doi:10.1038/s41598-018-21672-8), 2018-02-21
Supplement: 41598_2018_21672_MOESM1_ESM.pdf [file 41598_2018_21672_MOESM1_ESM.pdf]

## **Supplementary information**

### **A tomato MADS-box protein, SICMB1, regulates ethylene biosynthesis and carotenoid accumulation during fruit ripening**

Jianling Zhang, Zongli Hu, Qiyuan Yao, Xuhu Guo, Vanluc Nguyen, Fenfen Li

Guoping Chen \*

Laboratory of molecular biology of tomato, Bioengineering College, Chongqing University, Chongqing, People's Republic of China

\* **Corresponding author:** Guoping Chen

Bioengineering College, Chongqing University, Chongqing, People's Republic of China

Phone: 00862365112674

Fax: 00862365112674

E-mail: [chenguoping@cqu.edu.cn](mailto:chenguoping@cqu.edu.cn)

Supplementary Table S1. Specific primer sequences used for *SICMB1* gene amplification and cloning procedures.

**Table S1.** Details of primers for qPCR amplification

| Primer Name          | Primer Sequence (5'-3')                                                 | Application                                                                   |
|----------------------|-------------------------------------------------------------------------|-------------------------------------------------------------------------------|
| <i>SICMB1-i</i>      | CGGGGTACCAAGCTTACTCTGTAGCACATTGGCATATCAC                                | To establish <i>SICMB1</i> RNAi lines; add <i>KpnI</i> +                      |
|                      | CCGCTCGAGTCTAGAAAGATTAGTATGAATATCACGCACAAGTC                            | <i>Hind</i> III and <i>Xho</i> I + <i>Xba</i> I site underlined, respectively |
| <i>SICMB1</i> -Full  | TACATAGCCTTTTTTCTTTTCCT<br>TGAATATCACGCACAAGTCG                         | Full-length amplification of                                                  |
| <i>NPT II</i>        | CTCAGAAGAAGCTCGTCAAGAAGG<br>GACTGGGCACAACAGACAATC                       | Positive transgenic plants                                                    |
| <i>SICMB1</i> (Y2H)  | CCGGAATTCATGGGAAGAGGTAAGGTAGAATTGA<br>CGCGGATCCTCAGATTCTGAATTCGCCCCT    |                                                                               |
| <i>RIN</i> (Y2H)     | CCGGAATTCATGGGTAGAGGGAAAGTAGA<br>CGCGGATCCTCATAGATGTTTATTCAT            |                                                                               |
| <i>SIMADS1</i> (Y2H) | CCGGAATTCATGGGAAGAGGAAGAGTTG<br>CGCGGATCCTTAAAGCATCCATCCATGAATA         | Construction of yeast two -hybrid vector                                      |
| <i>AP2a</i> (Y2H)    | CCGGAATTCATGTGGAATTTAAATGATTCCCC<br>CGCGGATCCTCAAGGTCTCATAAAATAATGATGGA |                                                                               |
| <i>TAGL1</i> (Y2H)   | CCGGAATTCATGGTTTTTCTATTAATCAGG<br>CGCGGATCCTCAGACAAGCTGGAGAGGAG         |                                                                               |

Supplementary Table S2. Specific primer sequences used for qRT-PCR analysis

| Primer Name     | Primer Sequence (5'–3')                              | Product (bp) |
|-----------------|------------------------------------------------------|--------------|
| <i>SICAC</i>    | CCTCCGTTGTGATGTAACCTGG<br>ATTGGTGAAAAGTAACATCATCG    | 173 bp       |
| <i>q-SICMB1</i> | TGAGCGTCAACTGGATTCATCTT<br>CCCTCTGACTGAGCAGGTTGTT    | 213 bp       |
| <i>ACO1</i>     | ACAAACAGACGGGACACGAA<br>CTCTTTGGCTTGAAACTTGA         | 181 bp       |
| <i>ACO3</i>     | CAAGCAAGTTTATCCGAAAT<br>CATTAGCTTCCATAGCCTTC         | 113 bp       |
| <i>ACS2</i>     | GAAAGAGTTGTTATGGCTGGTG<br>GCTGGGTAGTATGGTGAAGGT      | 107 bp       |
| <i>ACS4</i>     | GCTCGGAGGTAGGATGGTTTC<br>GTCCCTCTCCATTGTGCTTGT       | 151 bp       |
| <i>E4</i>       | AGGGTAACAACAGCAGTAGCA<br>CCCAACCTCCGTCTTCAC          | 167 bp       |
| <i>E8</i>       | GGCACCATTCAACATACCG<br>CTTTCACCGAAGAAGCACG           | 242 bp       |
| <i>ERF1</i>     | TTTTAGTATCGGATGGACG<br>GGCGGAGAAACAGAAGTA            | 102 bp       |
| <i>PSYI</i>     | AGAGGTGGTGGAAAGCAA<br>TCTCGGGAGTCATTAGCAT            | 298 bp       |
| <i>PDS</i>      | GCTTTACCCGCTCCTTTA<br>ACCTTGCTTTCTCATCCA             | 174 bp       |
| <i>LCYB</i>     | TTGACTTAGAACCTCGTTATTGG<br>AACAGTTCCCTTTGTCAATTATCTC | 137 bp       |
| <i>LCYE</i>     | GCCACAGGTTATTCAAGTCGTCA<br>CCAGTCCAAATAGGAAAAACGAT   | 196 bp       |
| <i>CYCB</i>     | CGACGTGATCATTATCGGAGC<br>GTGGTGAAGGGTCAACACAACA      | 98 bp        |
| <i>RIN</i>      | CATCATGGCATTGTGGTGAGC<br>AATTCAAAGCATCCATCCAGGTAC    | 194 bp       |
| <i>TAGL1</i>    | CGCAATAACTCCCTGCCTGTA<br>GAAGATGAAGAGCCTTGACCC       | 143 bp       |
| <i>FUL1</i>     | AAAATCAGTGGGAAATCAACTCATC<br>CCTTGCTGCTGTGAAGAACTACC | 139 bp       |
| <i>FUL2</i>     | CCGTGGGAGCAACAGAGTCAT<br>GGAGGCATCACAGAAGCACTG       | 167 bp       |
| <i>LoxC</i>     | TTTACTCCGCCCTACACGC<br>CCTGAAAGATCGACACCCA           | 121 bp       |
| <i>PE</i>       | GCTTGCGTCTTTGACAACTCAGG<br>GTGCCACCACTGCATTGCTAT     | 137 bp       |

## Supplementary Figures

```
-3500 AAAIATTAAGTTCATATGTTAGTGAGAATGAATGATAAGAATGGTATTATTAGGAATTTTGACAAAATCCATCATGTAAACATTTTATATTAATATCAATT
-3391 ACAAGGAAGAAITCTTGCCATATAATTAGTGTGGTCTTACTTTGTATTGGGAGAGACAAAATAATGTAAGAAAAGATGAACAACCTTATATTGAGGTAGCGTAGT
-3286 TAAAGAGAGAGTTGAGATAAAGAAAAGTATTTTAAAGTCTTAACTATGTATATTGCAATATAAAAAGAGAGTAATTATATATAAAGAAGGTATCTGTTTGGGAT
-3179 CTTTGGACTCTTAACTAAATTCGAAGTTGTTGAGTTGTACAACGTTGTAGGTTATTGTATTCGGAAGGGAACAAGTCAAGAGTTATACCGCTACATCGGTATA
-3073 GATATGTCGCAAAGTGAGCTTAAATCTTTAAAGTGAGCGAGATATCCGCGCTAAGTCTAATAATTTGTTIATCAITTTTGTCAITTTTAACTGTAATAT
-2965 ATTATATTGTTGATATAGTACTAACAGATCTTGCTATGATATCATGTAAATTAGATCTTTTATCGAACTATAACCTCAAATGCTAGGTCAAATAAAAAGAATTA
-2857 ATGCTAAAGCTTATAAAGAAGTCCAACGATCTTATTACTCTATTGGTTGAGTAGGGTGATAAGGACCCTAATTAITGGATCTTCATGGATTACAATAATAG
-2750 TCAAGCAAAGCAAAAAGAAAACATACACAATTAAGTGAAGGGGAGAAAGATTTTTTTTTGGTTTCTCACTCGGTGCCAAAATCATATTGAAGTCTCGACT
-2646 AATTCGGAAGAGCTCTGAAGGGCTCAITTTGGGGGGGGTCTTCCAACCATGATTTCTCCATACCCAAGACTTGAACCTCAAGACCTCTGATTAACCATAAA
-2542 CCAITGTGATAGAAGAGAGTTTATTTAAAAATGAATCATTATATATTGCTTAGTTTTTATTTTGTATGATGAAGAAAAGTAGAAGGAAACCATATTATCTT
-2434 TATTAACCACATATATTTTTCATTATATAAAATCTTTTTCATTATATAAAATAATTTTCAATTTTGGAAATAAATATTAGTCTGTGAAGAGTACCATATAT
-2323 ACAATGCAAAAAGAACTTTATCTAATATGTCATTTCTTATTCAAGATGTAATTGTAGATTTCGACCAAAAAGAGATAAGAGAATAGATAAATCCAATATA
-2217 CTTAGCTCCATCTTTTAGCAGAGATATACCCATCTCCA AAAAGATGGCAATATGTTTACCATAAATAAATAAATATATATAGGTCAATTTGATGGAATG
-2109 TATATAAGACTATGAAAATTAATATAAAATAGGCATTATCTAATTTTATAITTTTATTTTATGAAATGAGTGTACTAATTGATATTATGAATTGTGATATTCAAC
-1999 TTAGGTATTGAAATCAATCCCATACACTATGTCTTTTATCTTTTGAATCAATTTTCTCTCATTAATATTGTTGTAATCAAGATTGATTAATACGTTAACGT
-1889 ATTTAGTTTATGTGATTACAACTTGAITTTAAATATTGAAAGTGAATATTGTTGATATGATGGAGTAACATGATGACACATCTTAGGTATCTAAT
-1780 ATCAAAATATCCAACCTATGTAACAGAAACATGTGGTATGTCCTCAA AAAAGATACATCAAGGGGGAGTGTGCTATGCTTGTTTAAGGAAAAACAACAACATTA
-1676 AGGTGTTATACATTTTATAGCACCAAAAATCTTGTAAAACCTTGATTGCTAAATACTTTTCGACTTGAATATATGTTGACAGTGAAAAAGATATTCACG
-1569 ATCGAATATTGTTTCAGTAATTTATGATGAATTTAAATGATAGTGTAGTAAGATATACTTACCTATACTATATTTGATGATGAAAAGATATTATAATGCTAGT
-1459 ATGATGTAATTTGTGAAAAGTCCGCTCGATGGTTAAGAATTGGTATATTTTAAATATGATCTGAACAATTTTTTCTTATGAGTTCGCTCTTACATGATATT
-1350 AATACACGATTCATCCATCTTGCTTTTGTGATGTAGATCTTCAATAAAATATCCACGCATATATGCCAGTCATAGCTAGAAAAATATGATCTCTTTAA
-1242 TATAATTAGATATTTTTTTCGTCAATTAACCTTTTGAATTTTATAGATATGATATTCCAATATAAGGGCTAATAATGATCTCCATATAAAGGCTTTTCAAAC
-1132 ACTCCCAATCCAGTAAGGGATACA AATACCTACAACCTTTAATATATGCTTACAATTTCCATTAATAATGGAATGTTGGGAAAACCTTTTATTTTAGTAGTTT
-1025 ATAAAATAATGAGAATTGGAACTTTTAAATAAATGTAATTACAACCGTTTCTGATACTTTATTTACGAATCGTATTACTCATTTAAAAAATGATATAAAATAT
-917 ATAAATAAATTTTCAATAATTTAATAGTTTCAACAATATGTTGTTTCCAATAAATAATATTTTTTATAATCTAATTACTATTTAAATAAATTTAATTTTG
-806 ATTCCAATCAATCTAACTTCAAAATCTTTAACTTATGCTTCCAATTAGTACTACACAACCTTATACCTAAAAAATTTCAAACTTATGCTCTCTTTAATTA
-698 TTTTGAATTTGATACAAAATAATACCACCCAAAATAGGGGCAAAAACCTTGATATTAAGGGTTAGTTGGTGAGAAACCAAAAATAATAATGTTAATAGTATT
-592 GACTGTCTCTTTTTTTGGCCCAAACATCAAAACACATTTTACTTATATTAATTATAGAGAGACAAGGGACACAGGCAGAGAAATAACA AAAAGCAGTTTG
-487 CAGAATTACCAAAAATGCAATATTTAAAAGGGTCTAAAAGTAATATTAATAAGGATCATTGATCGTGAATAAATTTTCAAGAATTAATTAATCTCAAATAAG
-380 TTATTTTATTTGCTATACATATGAGATAACATATCCGTTATTAATAATAAATGGGGTAGGAGAAATAATCTAAGAATAACTACCTAAGCTTCAACTAACAC
-272 ACGATAAATTTATCTGAAATTTATATCTTATACGTGATAGATAAGAAAATAAGATACAATGTTGTAATATTAGGAAACCCCATGGCCCAACAAGCTATTAT
-164 TATTACCCTAAGAAACAAAAGGACAGAAAAAGAACCAAAACCATACTACTATCAATATCTTATATACATAGCCTTTTTTCTTTCTTTTATCAAAACATGA
-58 CTAGATTTGAGATTATAATATAAGATTTTGATACTATATTTATAATAATATTATAATGGGAAGAGGTAAGGTAGAATTGAAGAGAATAGAAAATAA
```

**Supplementary Fig. S1.** Promoter analysis of *SICMB1* gene. Promoter sequence (3500 bp regions upstream the 5' end of the predicted ORF) of *SICMB1* gene was extracted from SGN database and searched against the promoter database plant CARE (<http://bioinformatics.Psb.ugent.be/webtools/plantcare/html/>), ERE motif (ATTTCAAA) are the ethylene-responsive element in *SICMB1* promoter region.

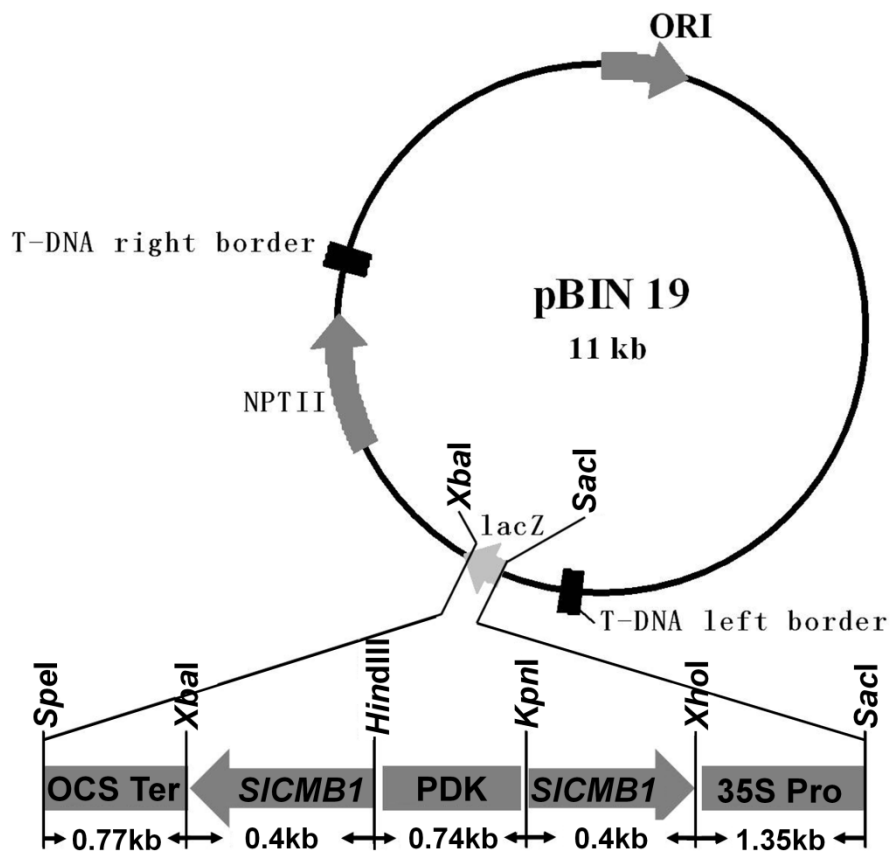

**Supplementary Fig. S2.** Hairpin construct of the *SICMB1* gene for double-stranded RNAi vector. The *SICMB1* gene-specific sequence in the antisense and sense orientations were linked with a PDK gene fragment and as a transcriptional unit for hairpin RNA expression which promoted by the CaMV 35S promoter and terminated by the OCS terminator. Among which, *SpeI* and *XbaI* are isocaudamers.



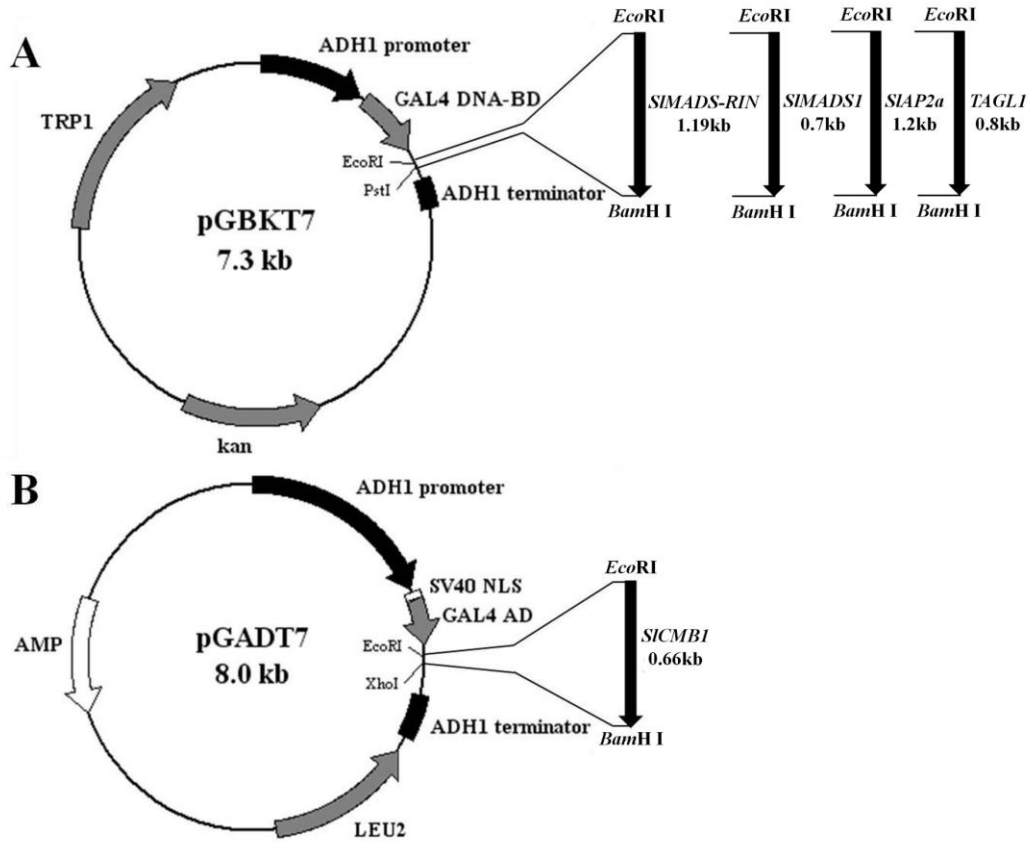

**Supplementary Fig. S4.** Construct of SICMB1 and RIN gene for yeast two-hybrid vector. (A) The ORFs of *SIMADS-RIN*, *SIMADS1*, *SIAP2a*, *TAGL1* were cloned into pGBKT7 bait vector to obtain the vector pGBKT7-*SIMADS-RIN*, pGBKT7-*SIMADS1*, pGBKT7-*AP2a* and pGBKT7-*TAGL1*, respectively. (B) The ORF of *SICMB1* was cloned into pGADT7 prey vector to obtain the vector pGADT7-*SICMB1*.

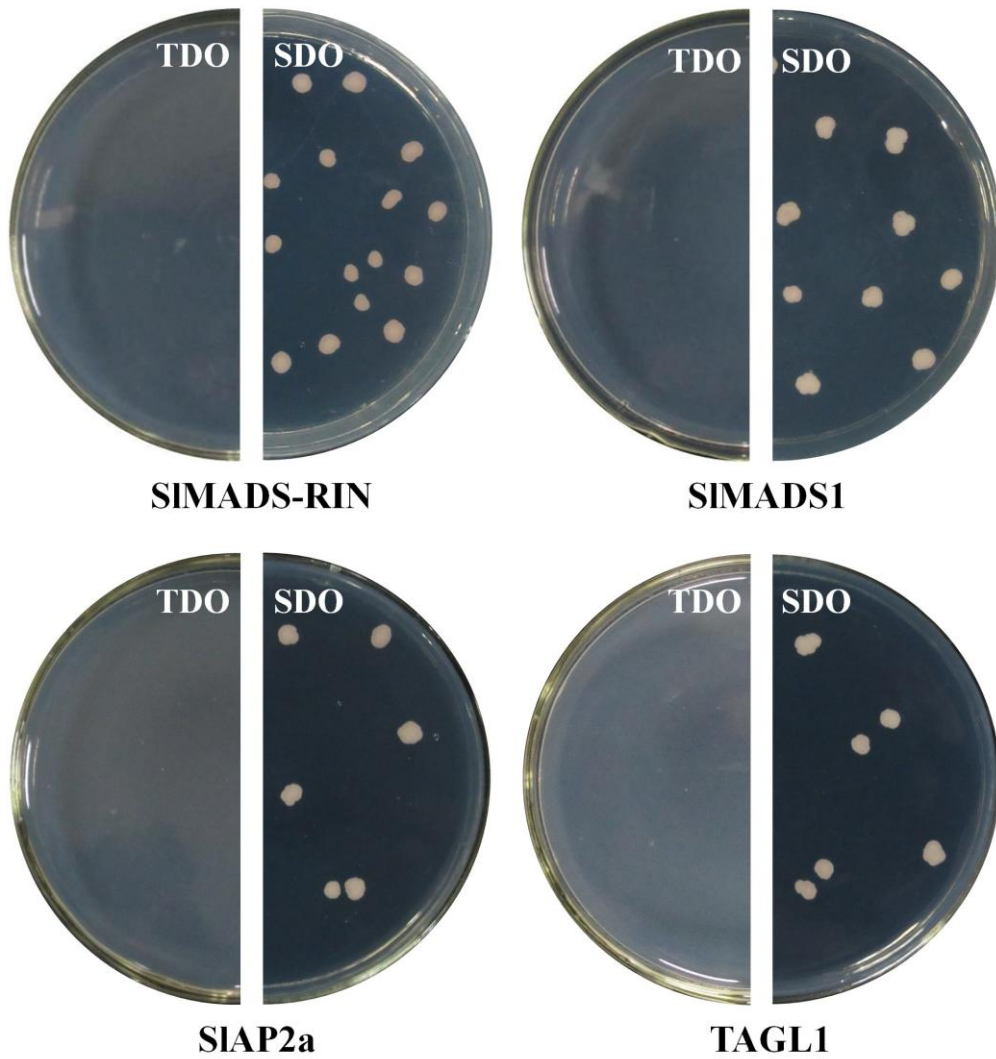

**Supplementary Fig. S5.** Yeast two-hybrid assay for SICMB1 and SIMADS-RIN, SIMADS1, SIAP2a and TAGL1. TDO, SD medium without Trp, His, Ade (autoactivation assay); SDO, SD medium without Trp (autoactivation assay).
